# Supplementary material for: Engineering large-scale chromosomal deletions by CRISPR-Cas9
Source: Nucleic Acids Res. 2021 Jul 7;49(21):12007–16. doi: 10.1093/nar/gkab557 (PMC8643637; doi:10.1093/nar/gkab557)
Supplement: gkab557_Supplemental_File [file gkab557_supplemental_file.pdf]

# Supplementary Figure 1

## Tumor Neuroblastoma NRC - 262

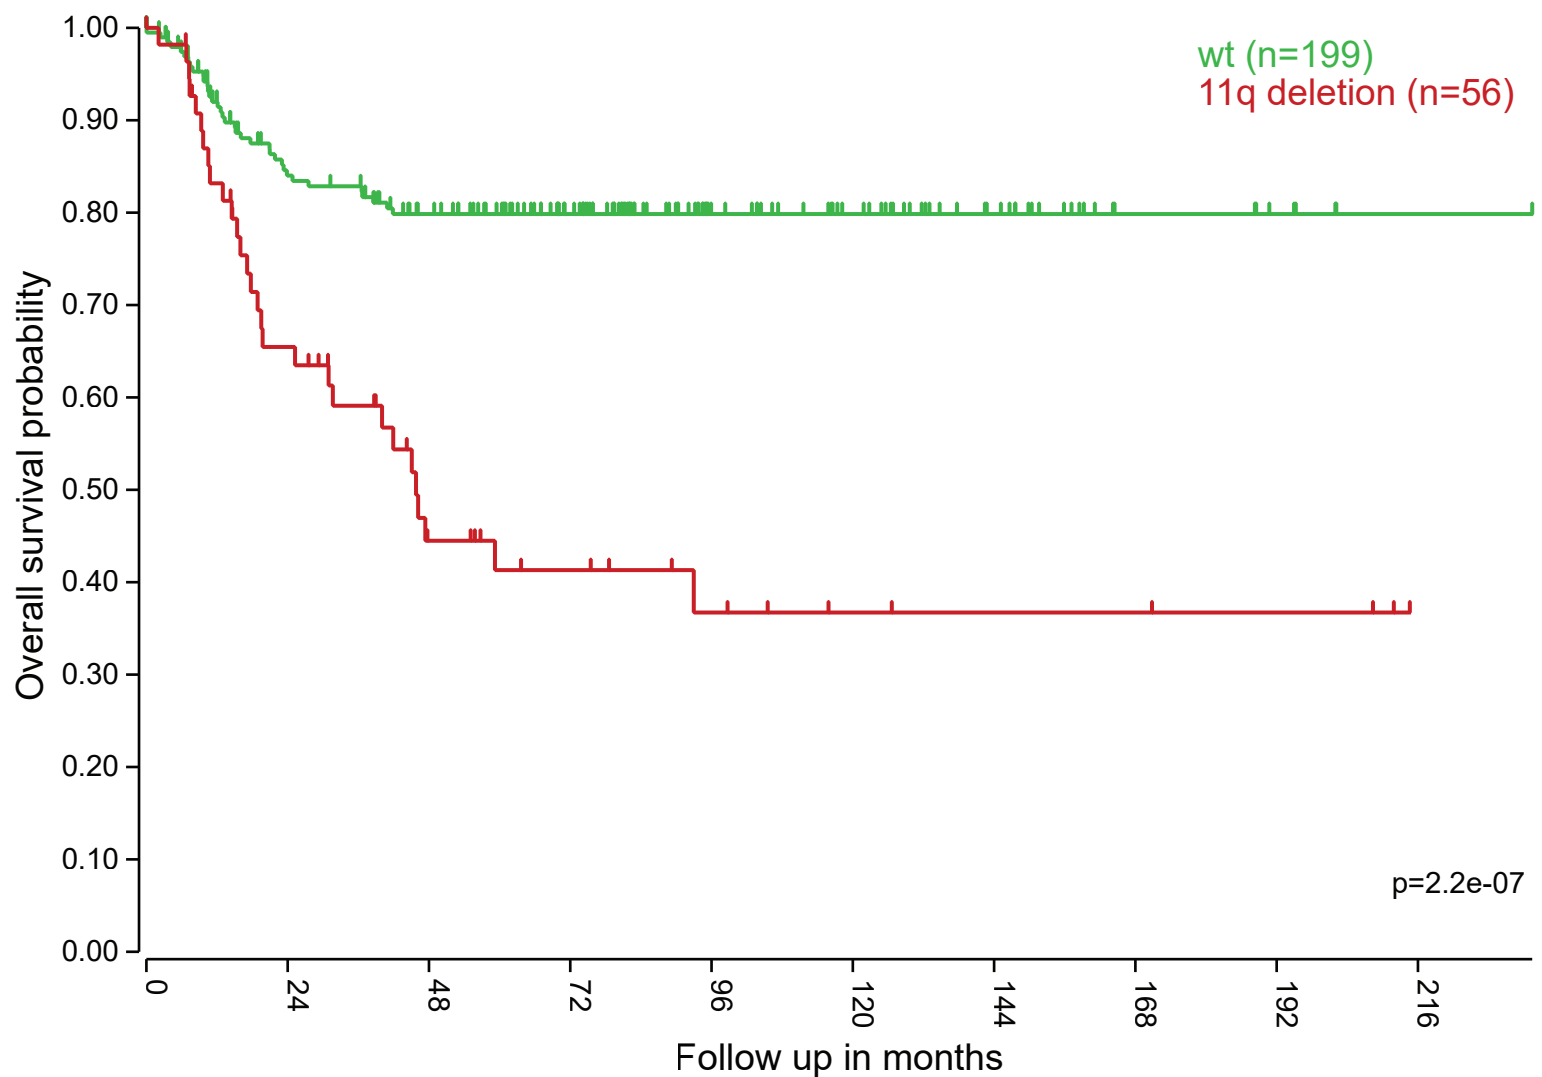

**Supplementary Figure 1:** Kaplan-Meier analysis of 11q deleted neuroblastoma tumors versus tumors that do not show an 11q deletion in a set of 262 neuroblastoma tumors (PMID: 23308108). The p-value was calculated using the log-rank test.

# Supplementary Figure 2

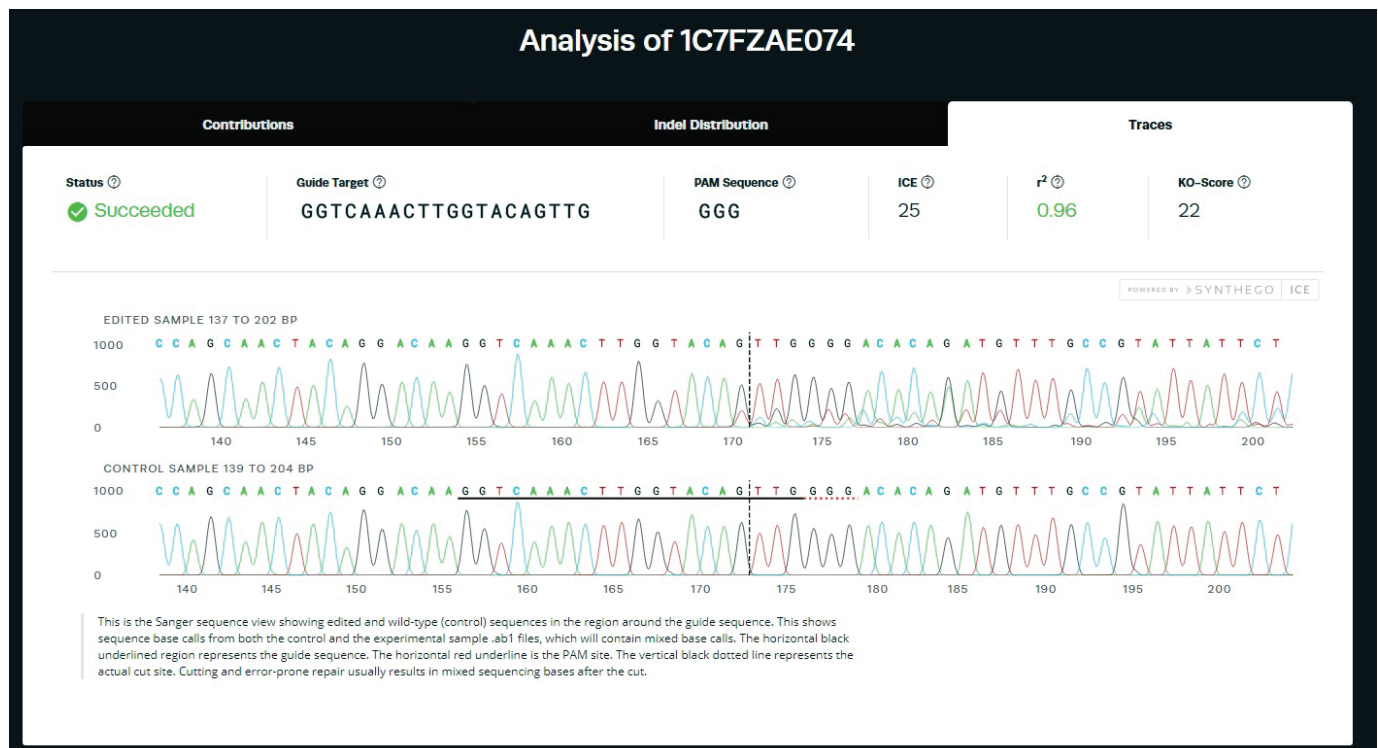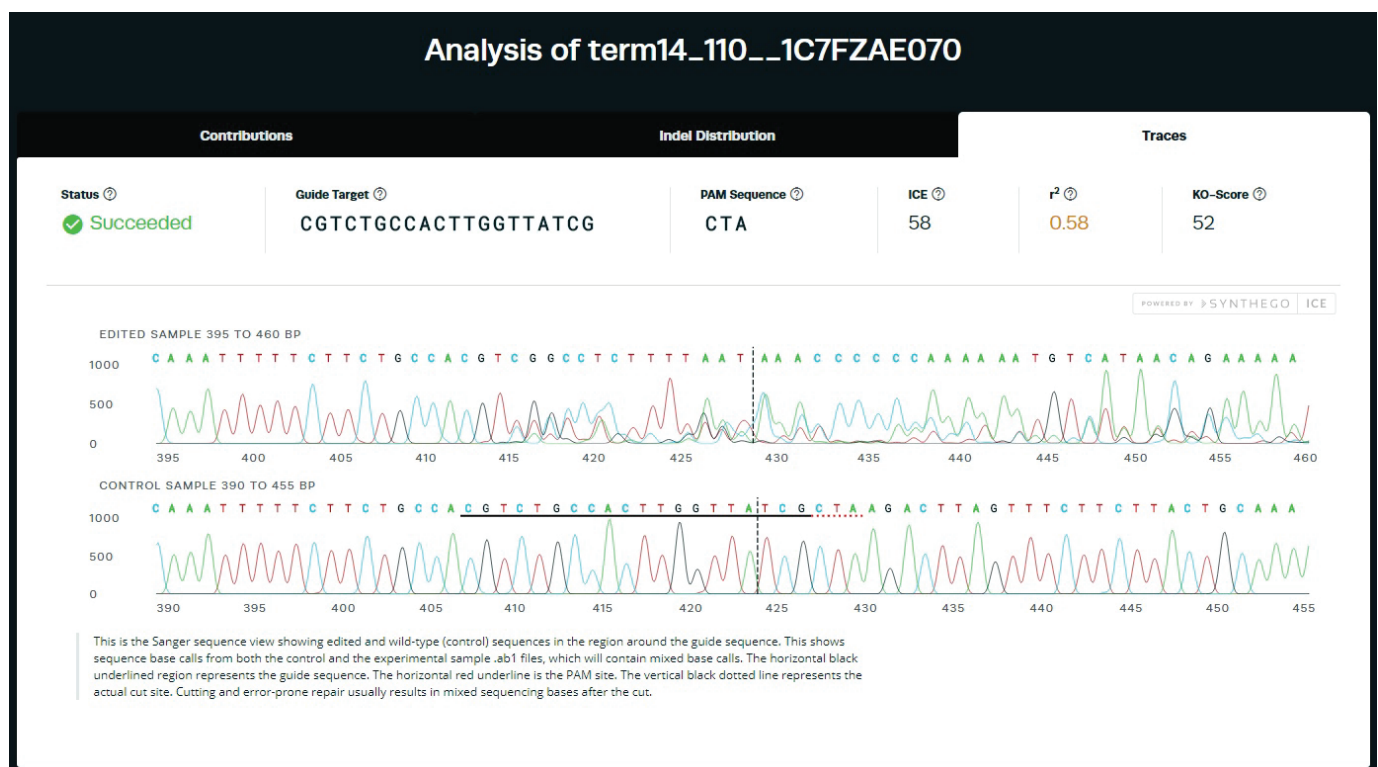

**Supplementary Figure 2:** ICE analysis of efficiency of the 11q Centromeric (upper) and 11q Telomeric (lower) single gRNAs. ICE scores in the upper bar represent the frequency of insertions/deletions/changes in the edited samples.

## Supplementary Figure 3

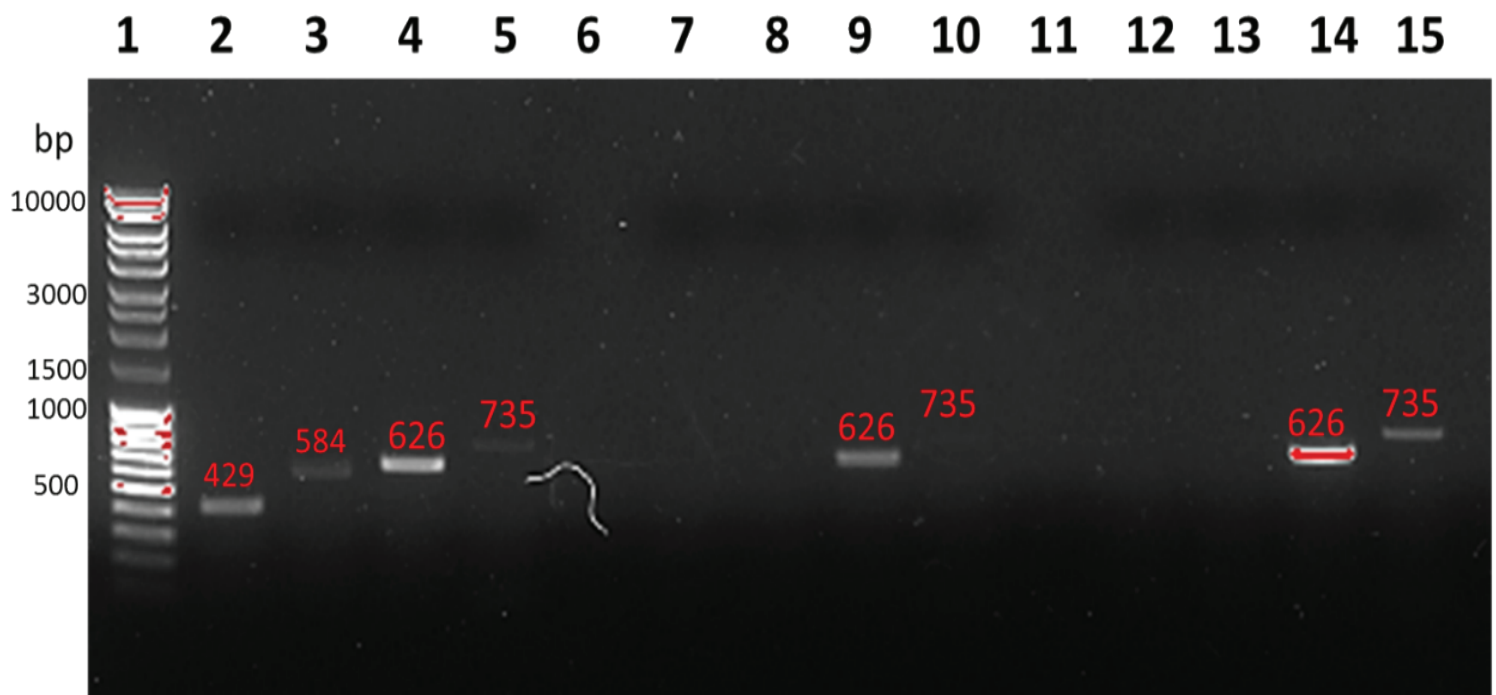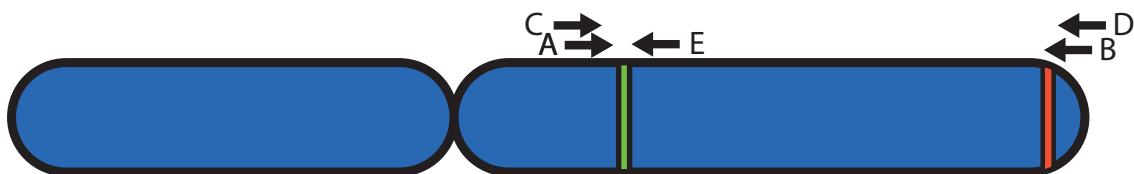

**Supplementary Figure 3:** Agarose gel electrophoresis of PCR reactions performed on cells transfected with 2 gRNAs and a ssDNA (lane 2-5), transfected with 2 gRNAs (lane 7-10) and wild type cells (lane 12-15). Primers combinations are A+B (lane 2,7,12), C+D (lane 3,8,13), A+E (lane 4,9,14) and C+E (lane 5,10,15). Lane 1 contains Generuler 1kb DNA ladder (Thermo Fisher Scientific). Lower figure is duplicated from main Figure 2A for reference.

# Supplementary Figure 4

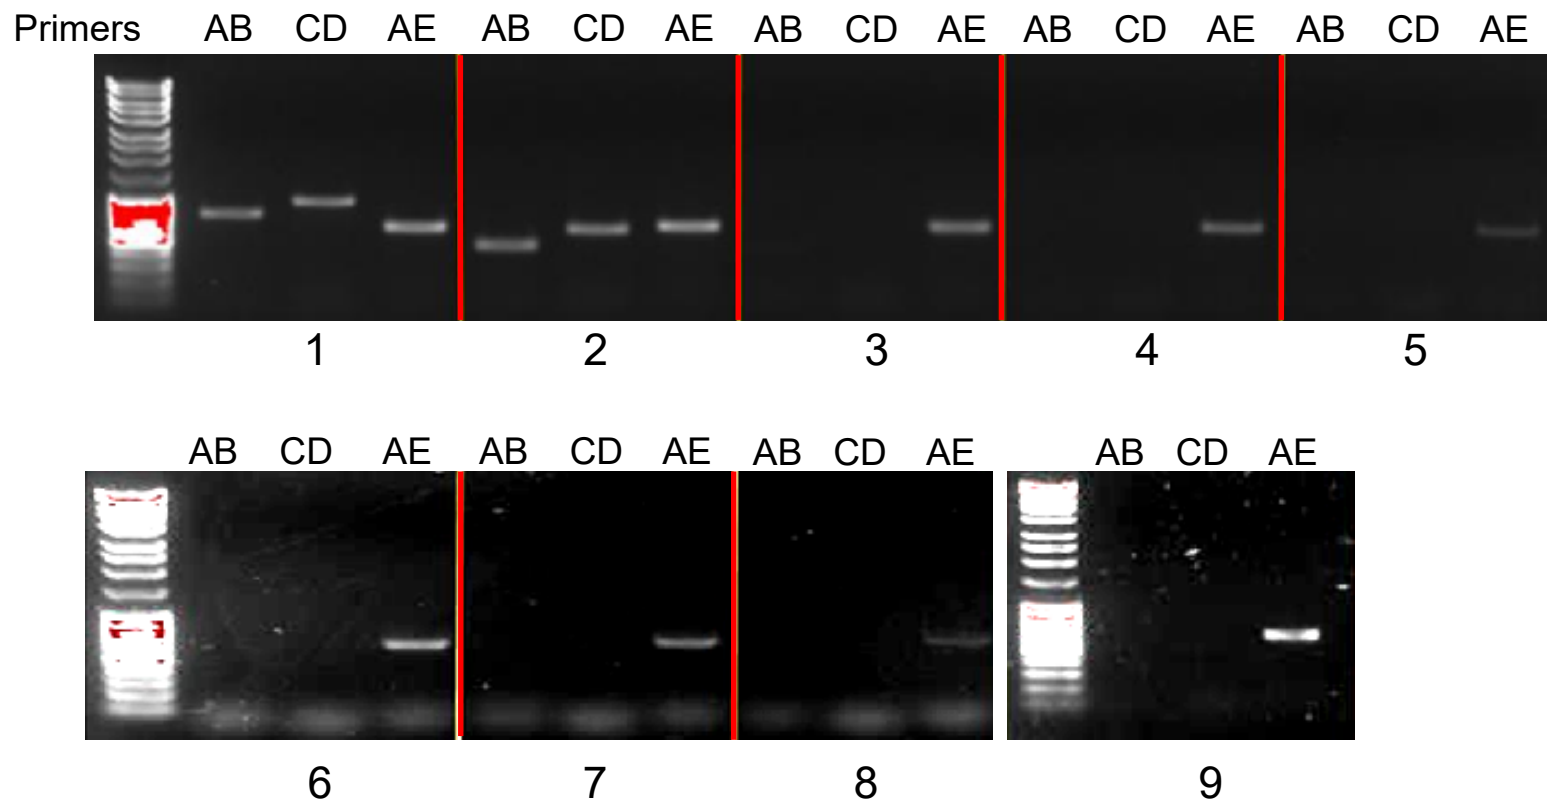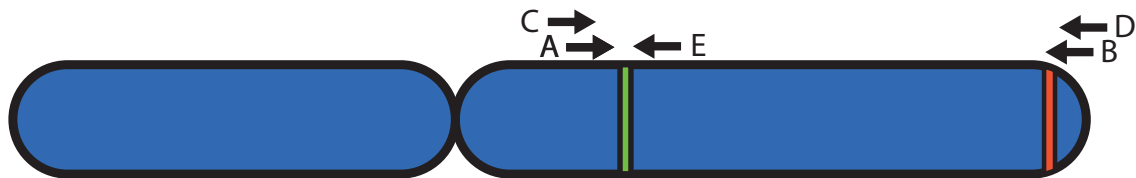

**Supplementary Figure 4:** Agarose gel electrophoresis of PCR reactions performed on 9 clones derived from cells transfected with 2 gRNAs and a ssDNA. Letters indicate the primer combinations used. The first lane of each panel contains Generuler 1kb DNA ladder (Thermo Fisher Scientific). Lower figure is duplicated from main Figure 2A for reference.

# Supplementary Figure 5

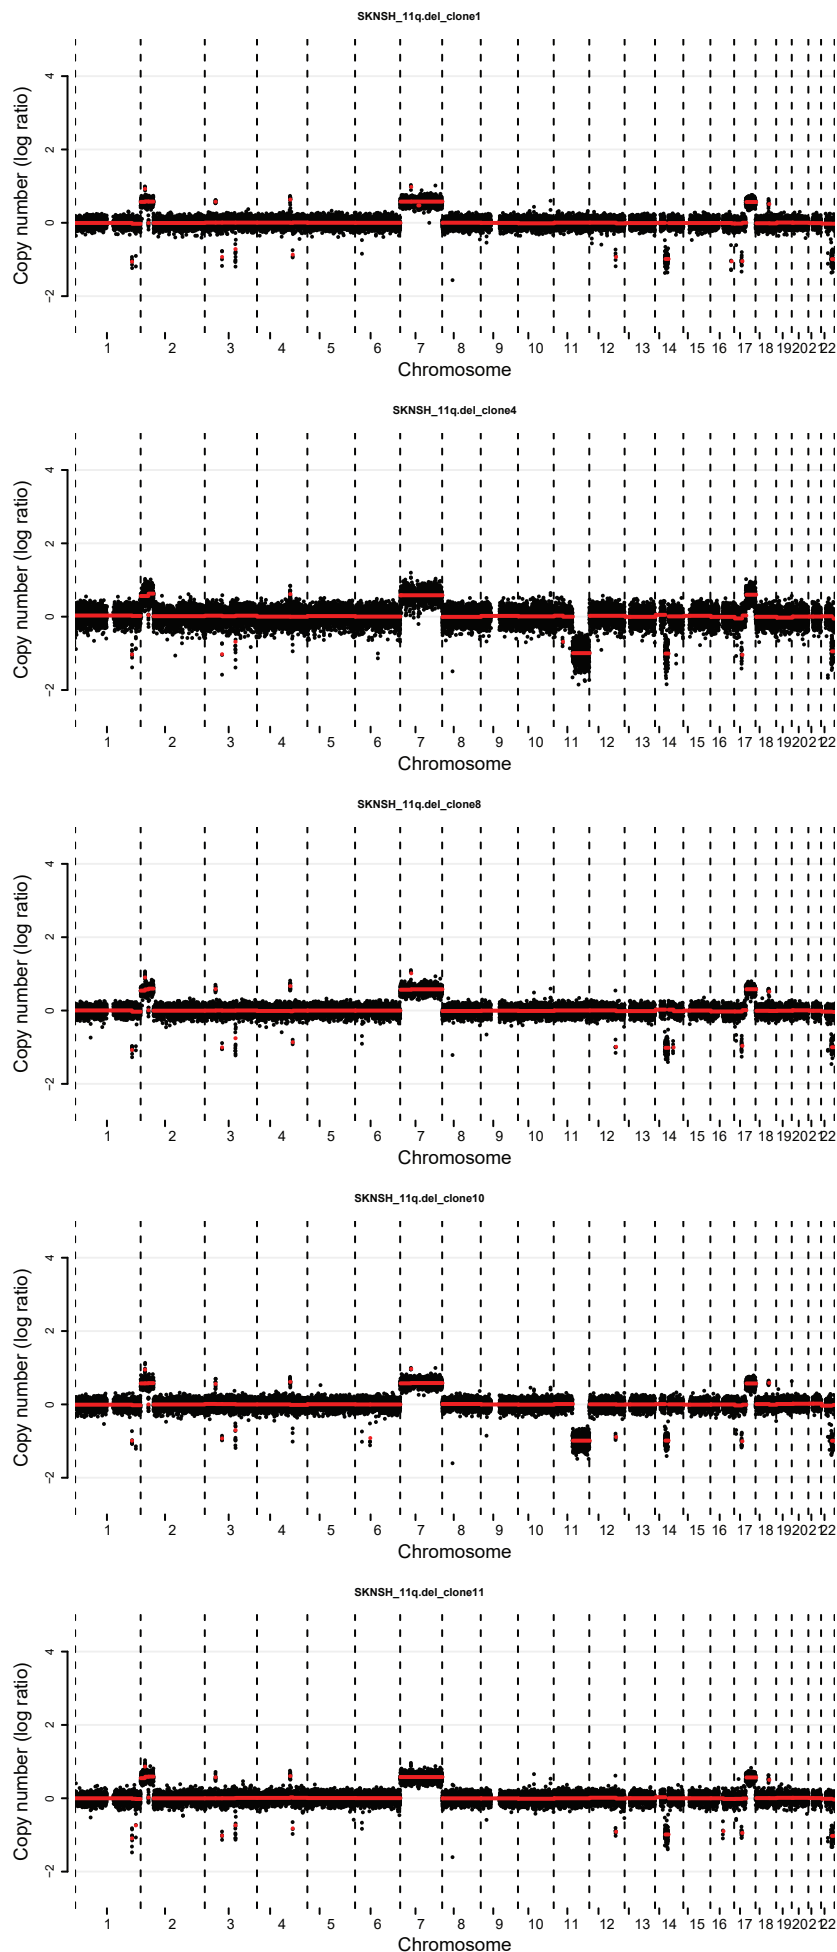

**Supplementary Figure 5:** Complementary to Figure 3A. Copy number profiles of translocation positive (clone 4, 10) and negative (clone 1,8,11) SKNSH clones. The x-axis shows the genomic location and the y-axis shows median-normalized log<sub>2</sub>-transformed copy number, with black dots representing bins and red lines representing segmented copy numbers.

# Supplementary Figure 6

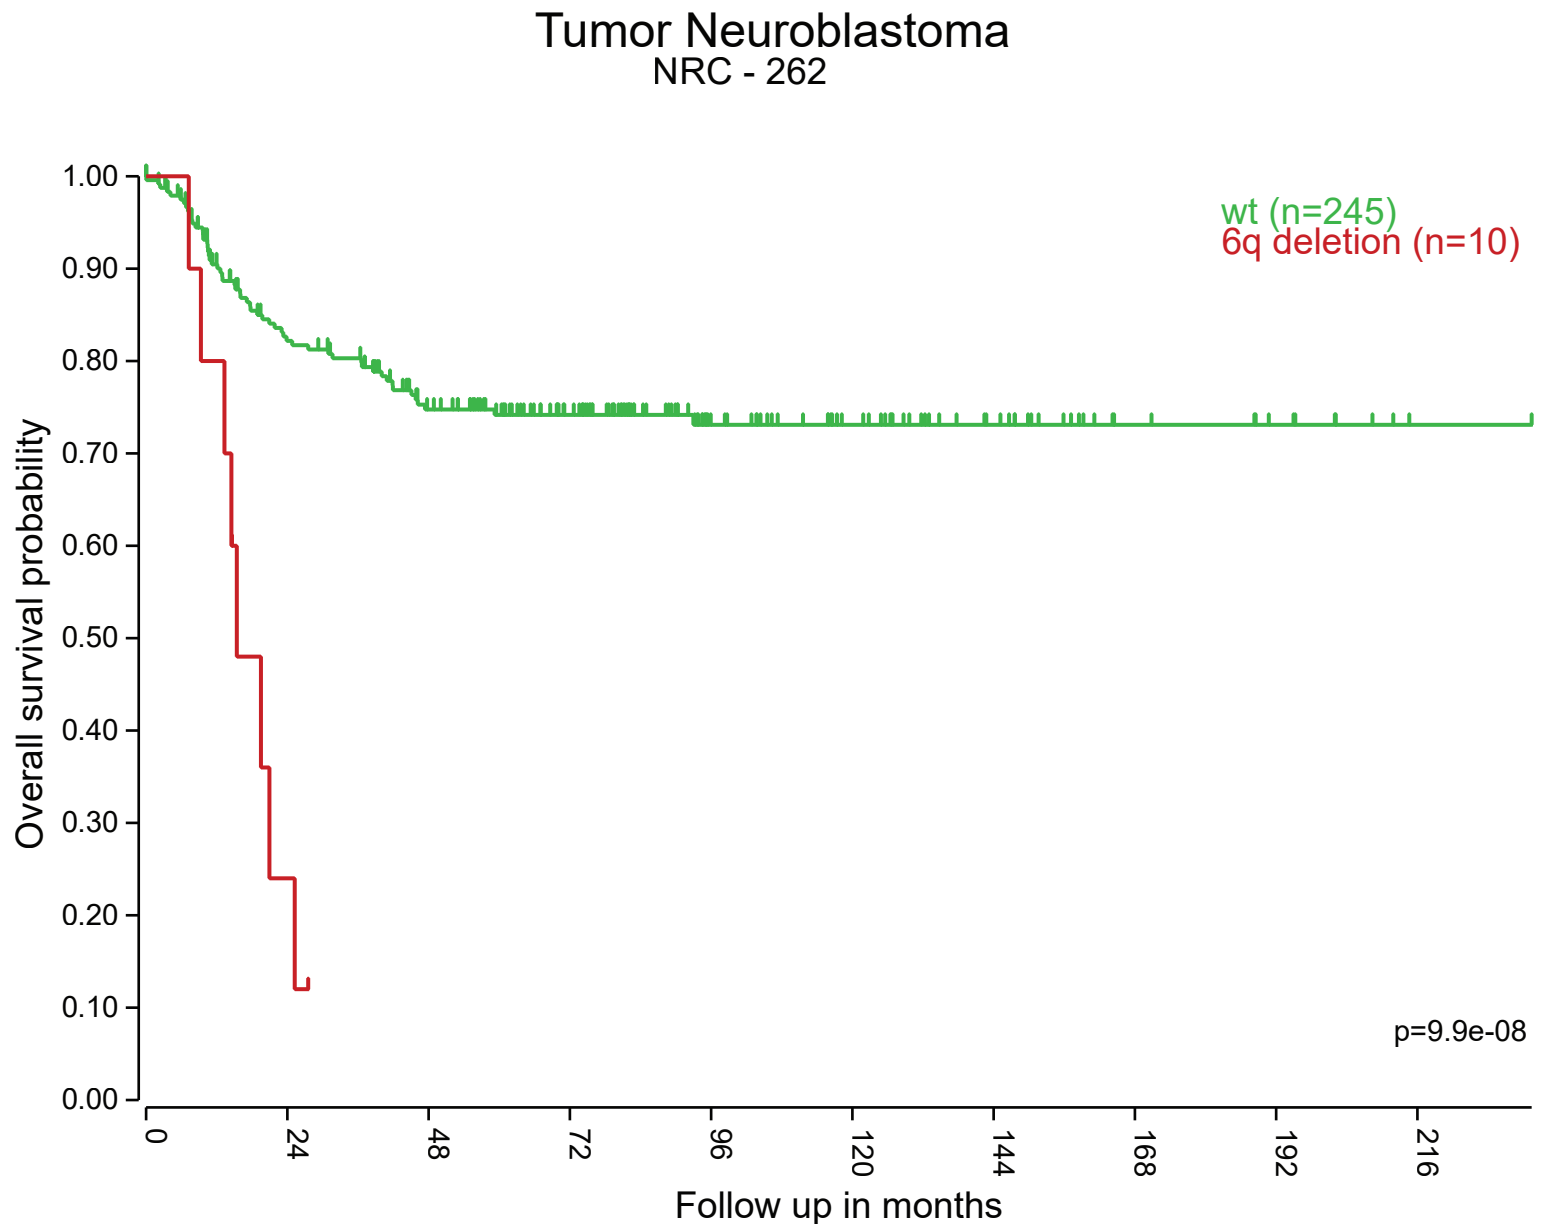

**Supplementary Figure 6:** Kaplan-Meier analysis of 6q deleted neuroblastoma tumors versus tumors that do not show a 6q deletion in a set of 262 neuroblastoma tumors (PMID: 23308108). The p-value was calculated using the log-rank test.

# Supplementary Figure 7

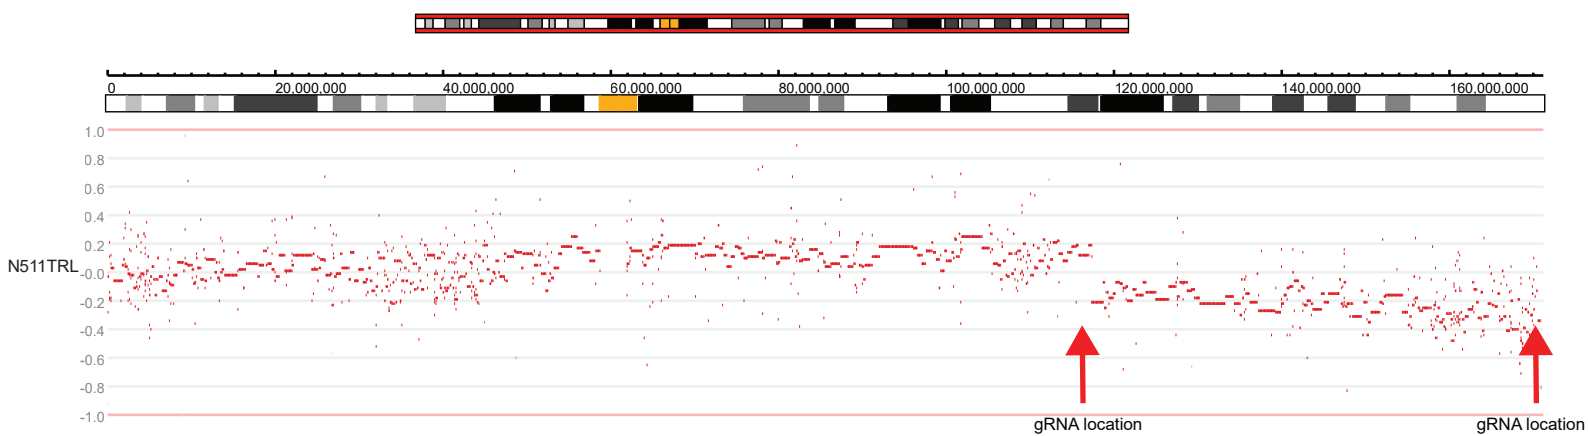

**Supplementary Figure 7:** Copy number profile of a neuroblastoma tumor with a 6q deletion. The red arrows indicate the positions of the 6q Centromeric and 6q Telomeric gRNAs. Data was generated by WGS (PMID:26121087) and visualized using the R2 bioinformatics platform. Red dots represent segmented values. Ideograms representing the chromosomal location and banding pattern (centromeres are represented in yellow) are shown above the profile.

## Supplementary Figure 8

|                |   |   |
|----------------|---|---|
| 6q Centromeric | + | - |
| 6q Telomeric   | + | - |

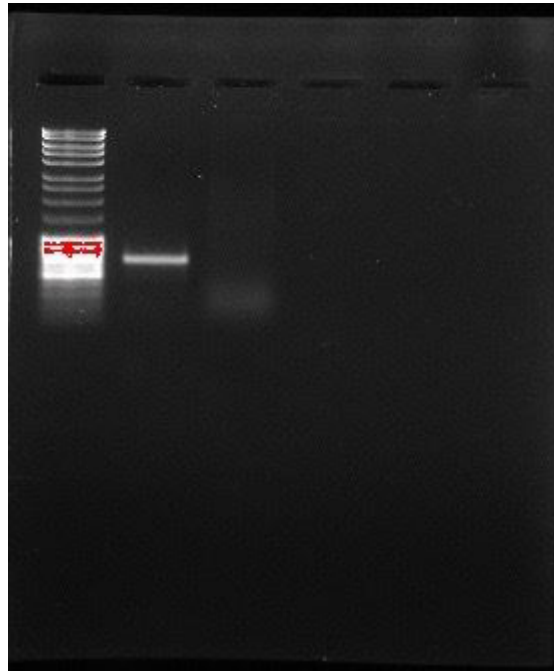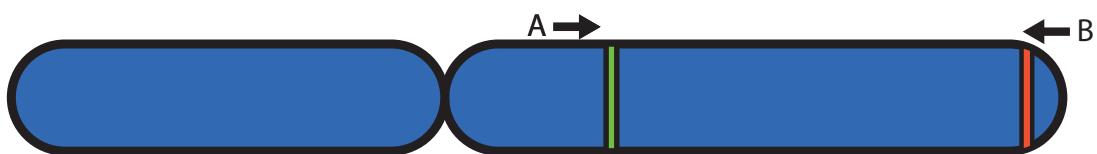

**Supplementary Figure 8:** Agarose gel electrophoresis of PCR reactions performed on cells transfected with 2 gRNAs (6q Centromeric and 6q Telomeric, lane 2), and wild type cells (lane 3). Lane 1 contains Generuler 1kb DNA ladder (Thermo Fisher Scientific). The primers used are shown in the lower figure.

## Supplementary Figure 9

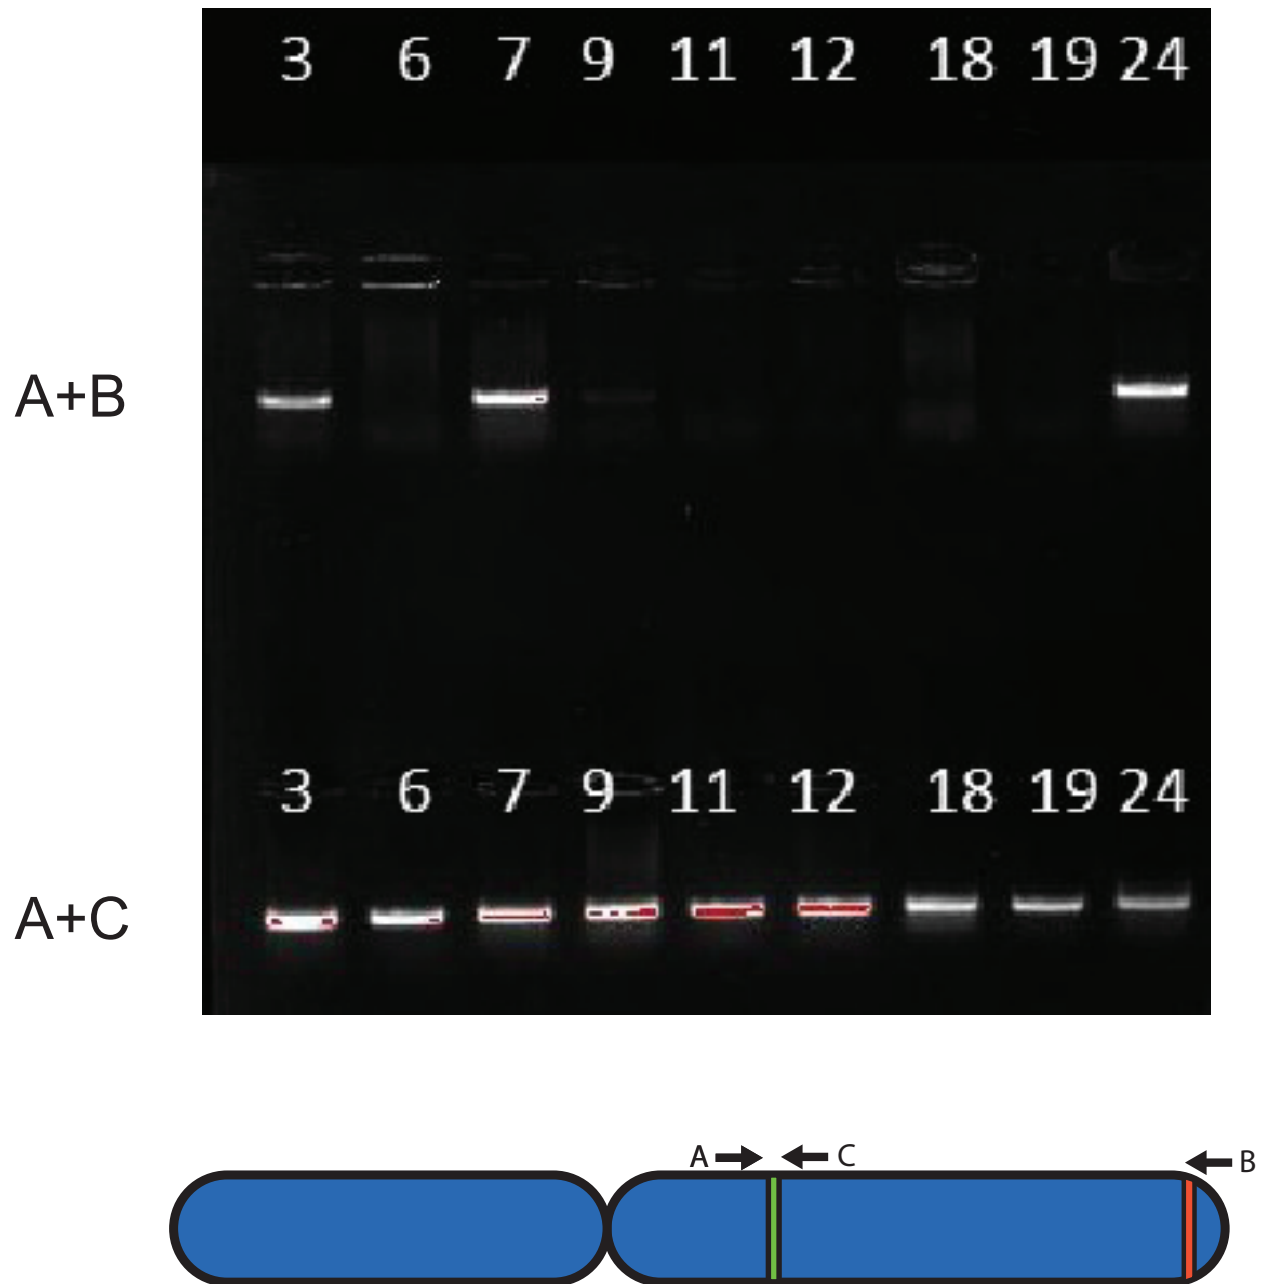

**Supplementary Figure 9:** Agarose gel electrophoresis of PCR reactions performed on clones derived from NMB cells transfected with 2 gRNAs for 6q. Primers used are indicated in front of the gel image, Lane 1 contains Generuler 1kb DNA ladder (Thermo Fisher Scientific). Primer locations are shown in the lower figure.

## Supplementary Figure 10

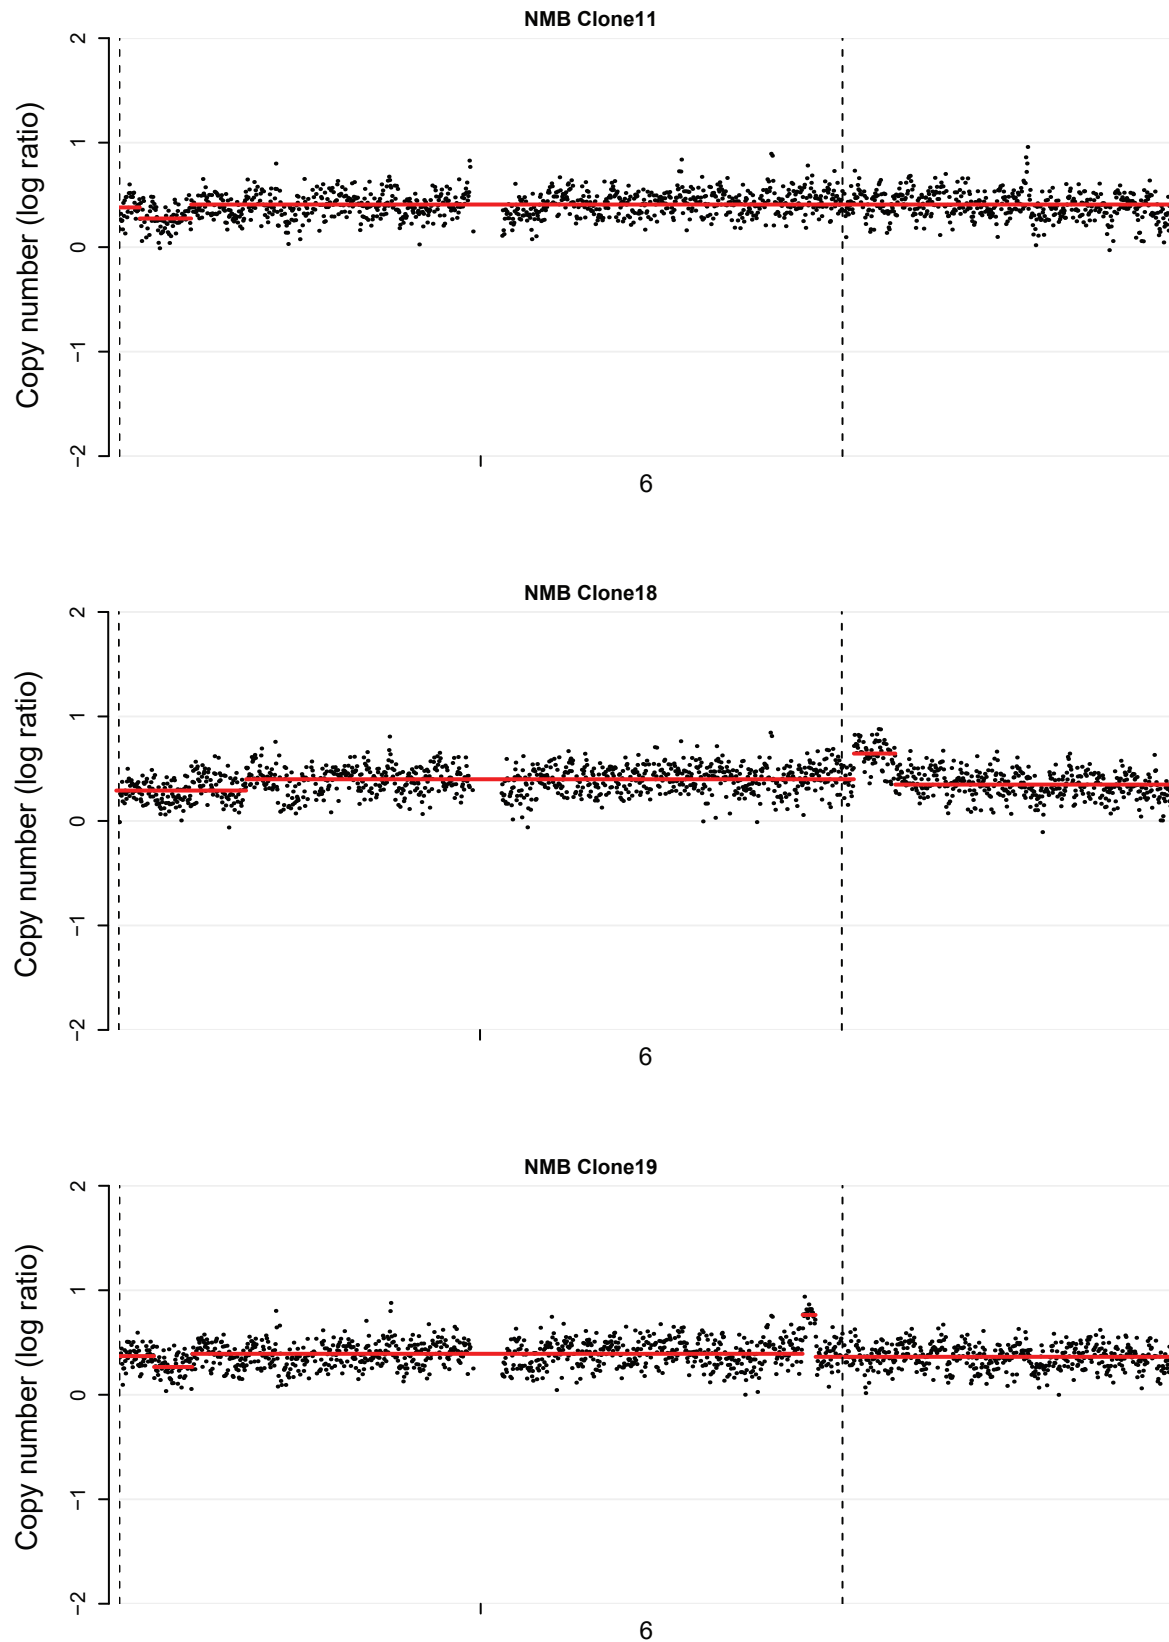

**Supplementary Figure 10:** Complementary to Figure 4A. Copy number profiles of translocation negative NMB clones. The x-axis shows the genomic location and the y-axis shows median-normalized log<sub>2</sub>-transformed copy number, with black dots representing bins and red lines representing segmented copy numbers.

# Supplementary Figure 11

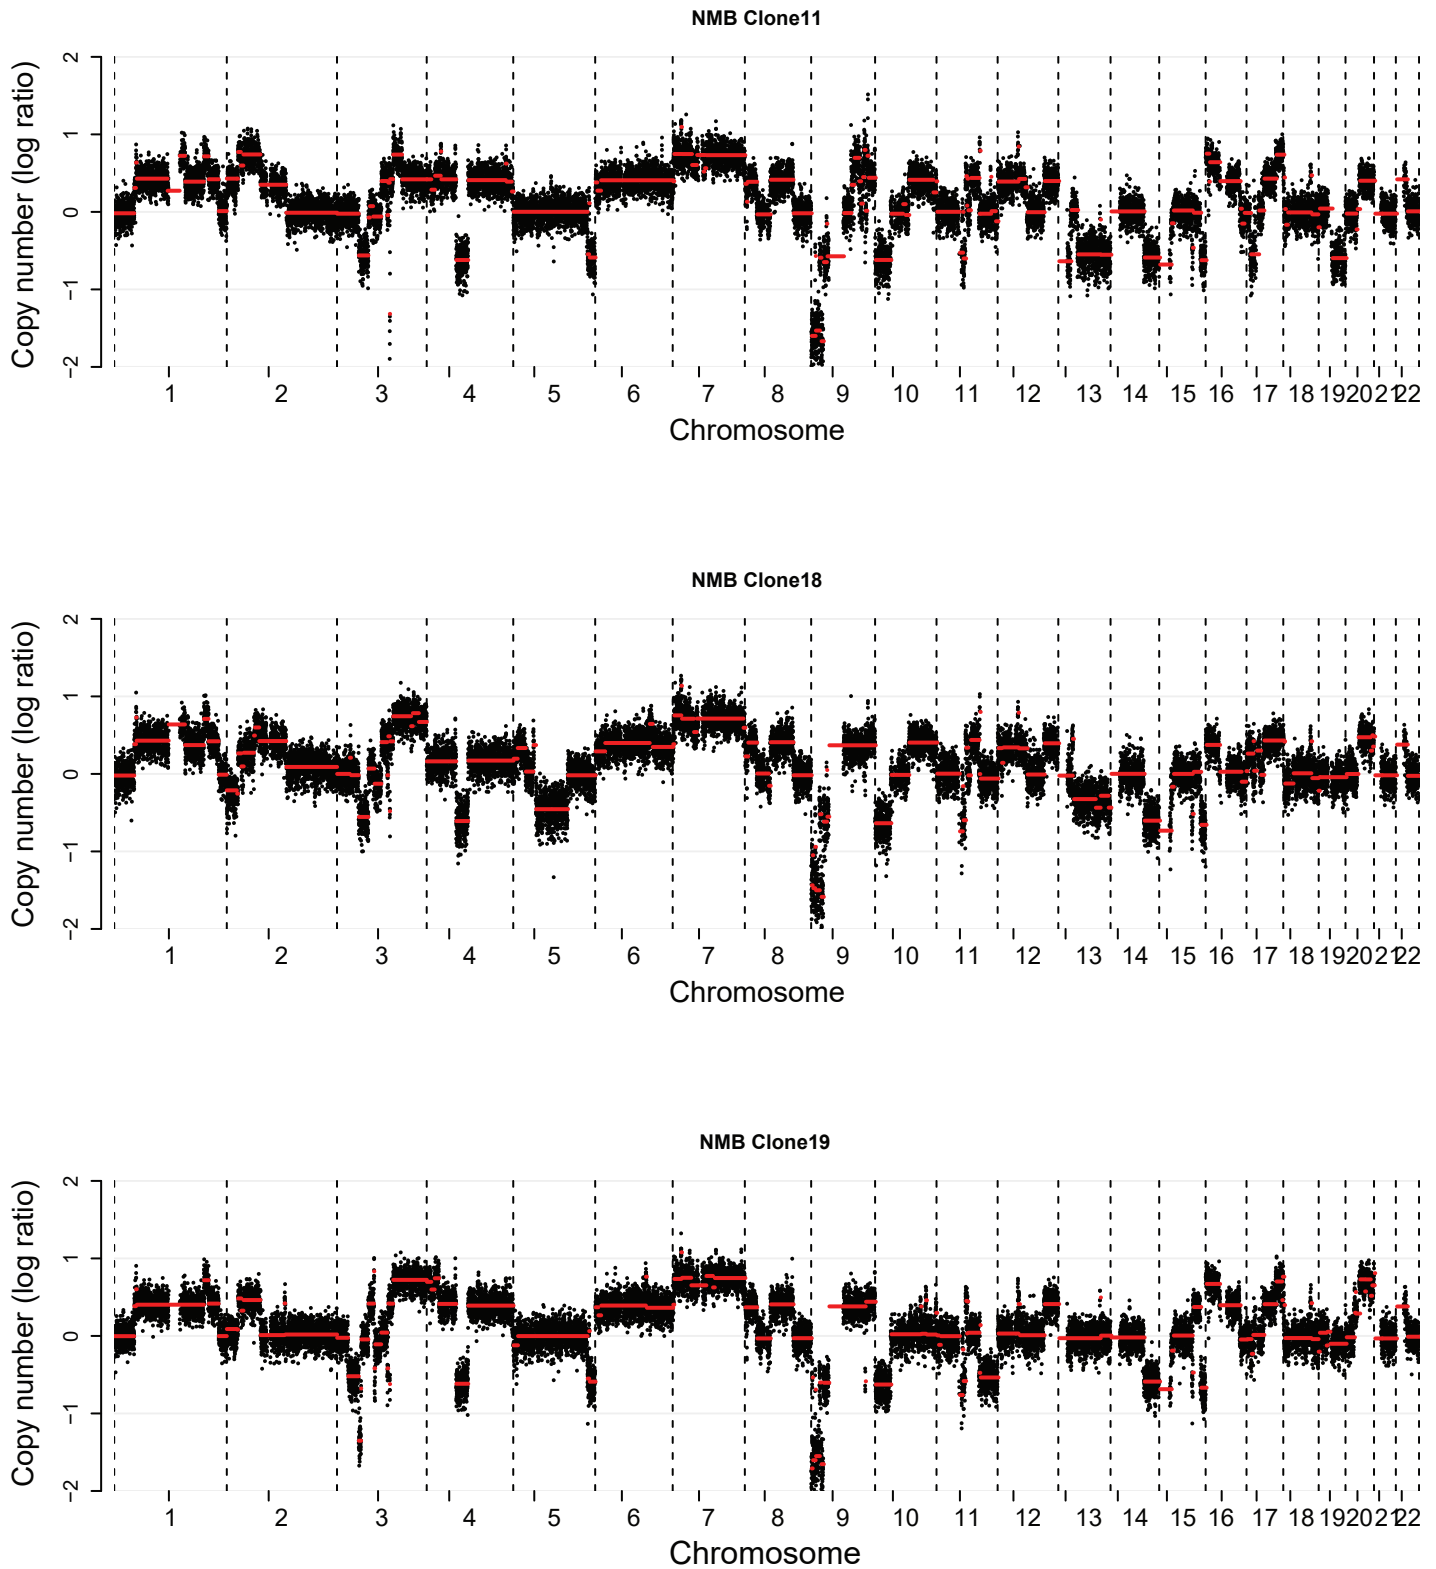

**Supplementary Figure 11:** Complementary to Figure 4B. Copy number profiles of translocation negative NMB clones. The x-axis shows the genomic location and the y-axis shows median-normalized log<sub>2</sub>-transformed copy number, with black dots representing bins and red lines representing segmented copy numbers.
